# Supplementary material for: Regulation of clathrin-mediated endocytosis by hierarchical allosteric activation of AP2
Source: PubMed Central journal article supplement — J Cell Biol. 2017 Jan 2;216(1):167–79. doi: 10.1083/jcb.201608071 (PMC5223608; doi:10.1083/jcb.201608071), 2017-01-02
Supplement: JCB_201608071_sm.pdf [file JCB_201608071_sm.pdf]

Kadlecova et al., <https://doi.org/10.1083/jcb.201608071>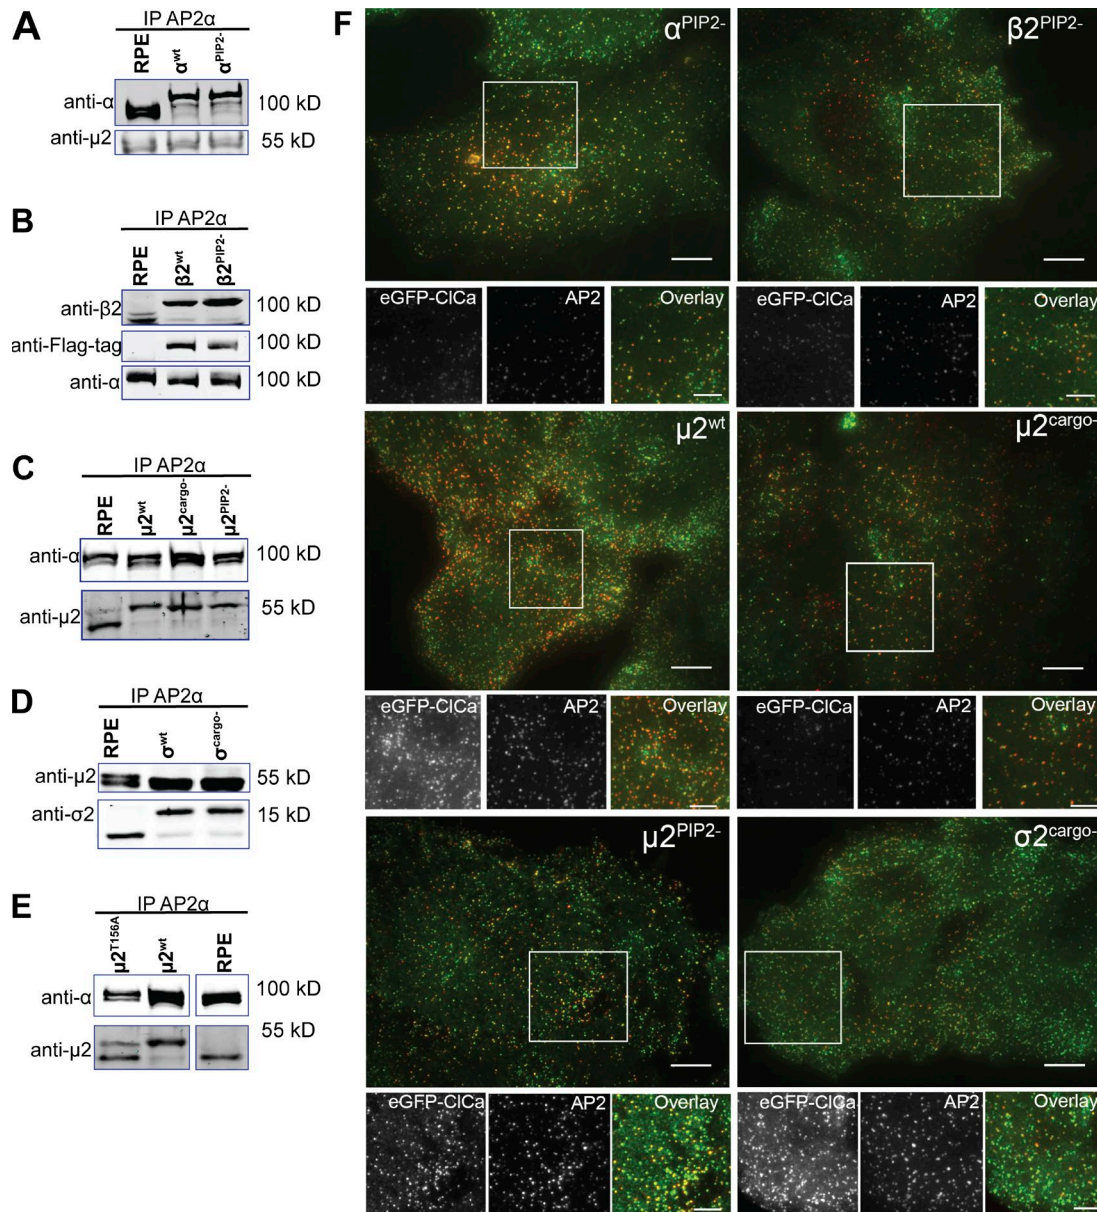

**Figure S1. Validation of AP2 mutant cell lines.** To ensure full incorporation of mutant subunits into intact AP2 complexes, antibodies against AP2  $\alpha$  were used to immunoprecipitate (IP) AP2 complexes from parental htertRPE (RPE) or the indicated mutant cells expressing siRNA-resistant wild-type or mutant AP2 subunits after siRNA-mediated depletion of the endogenous subunit. Western blot analysis was performed against exogenously expressed WT or mutant subunit and a second endogenously expressed subunit using antibodies described in Materials and methods. (A) Cells expressing  $\alpha^{wt}$  and  $\alpha^{PIP2-}$  bearing a brain-specific insert in the flexible linker. (B) Cells expressing  $\beta 2^{wt}$  and  $\beta 2^{PIP2-}$  bearing a Flag epitope in the flexible linker. (C) Cells expressing  $\mu 2^{wt}$ ,  $\mu 2^{cargo-}$ , and  $\mu 2^{PIP2-}$  bearing myc epitopes in the flexible linker. (D) Cells expressing  $\sigma 2^{wt}$  and  $\sigma 2^{cargo-}$  expressing Flag tags at their C terminus. (E) Cells expressing  $\mu 2^{T156A}$  bearing a myc tag in the flexible linker. Note in the latter case that the  $\mu 2^{T156A}$  mutant is inefficiently incorporated into AP2 complexes compared with endogenously expressed  $\mu 2$ . (F) Immunofluorescence localization of AP2 complexes containing mutated subunits  $\alpha^{PIP2-}$ ,  $\beta 2^{PIP2-}$ ,  $\mu 2^{cargo-}$ ,  $\mu 2^{PIP2-}$ , and  $\sigma 2^{cargo-}$ . Mouse monoclonal antibody against the AP2  $\alpha$  subunit was used to verify punctate pattern of AP2 complexes with mutated subunits at the plasma membrane and at the CCPs. Bars, 10  $\mu$ m.

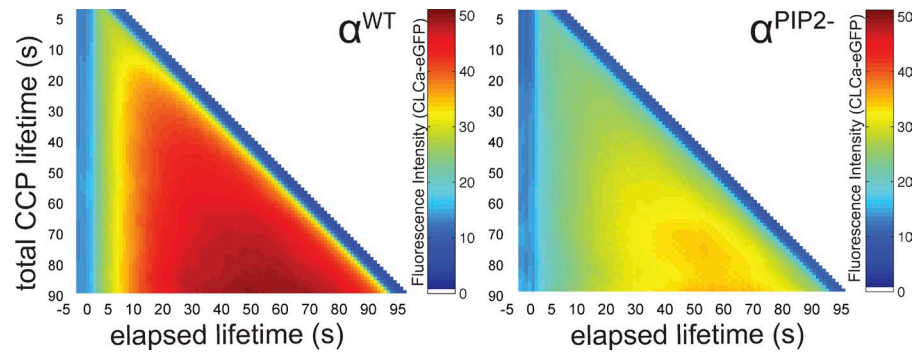

Figure S2. **Fluorescence analyses of clathrin intensity at CCPs in  $\alpha^{PIP2-}$  cells show that efficient clathrin recruitment in the first 10–20 s predetermines stabilized and productive growth of a CCP.** The progression of CLC-EGFP recruitment at individual CCPs in  $\alpha^{wt}$  (left) and  $\alpha^{PIP2-}$  (right) cells is represented as a heatmap. Increase of CLC-EGFP intensity is plotted as a function of elapsed lifetime of a given CCP (x-axis), for all CCP lifetimes ranging from  $\tau = 5$  to 90 s (y-axis). Total CCP lifetime is on the y-axis (top, short lifetimes; bottom, long lifetimes), the current “age” of the CCP is on the x-axis from left to right (the data stops at the diagonal because CCP age can never be greater than total lifetime). CLC-EGFP intensity is depicted as the color at each location. The fluorescence intensity profiles in  $\alpha^{wt}$  cells show clearly defined transitions (blue to green to yellow to red) at early stages of CCP lifetime at the left side of the  $\alpha^{wt}$  heatmap, indicative of highly regulated CCP growth and maturation. This also suggests that CCPs that recruit clathrin at a net faster rate in the first 10–20 s are the ones that will have long lifetimes and ultimately grow to larger sizes, as apparent from the total overall amount of CLC-EGFP. In contrast, transitions are blurred in the  $\alpha^{PIP2-}$  cells, and the relative maximum intensity at each lifetime is reached much later (i.e., at longer CCP ages). The CCP intensities in the  $\alpha^{PIP2-}$  cells are significantly lower than in  $\alpha^{wt}$  cells, indicating defects in growth and maturation.

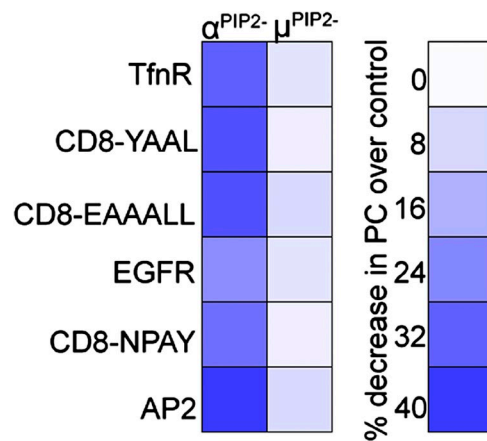

Figure S3. **Abrogation of  $\alpha$ -PIP2 interactions leads to a general cargo sorting defect.** Heatmap representing the relative changes in Pearson correlation coefficient (PC) between EGFP-CLCa and the indicated CD8 chimeras and other CME cargo showing more severe defects in cargo loading into CCPs in  $\alpha^{PIP2-}$  cells compared with  $\mu^{PIP2-}$  cells. AP2 recruitment and stabilization at CCPs is also reduced in the  $\alpha^{PIP2-}$  cells, but not in  $\mu^{PIP2-}$  cells.

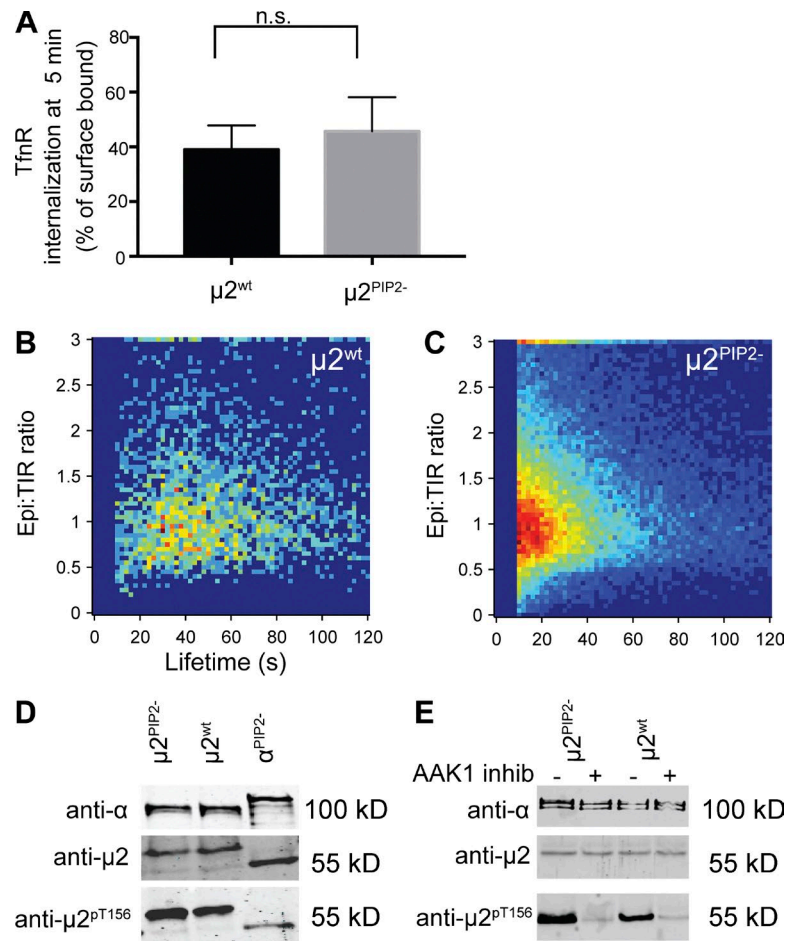

Figure S4.  $\mu 2^{PIP2-}$  cells show no apparent defect in TfR endocytosis but have a defect in CCP maturation, and efficient CME is restored by activation of AAK1 kinase and increased phosphorylation of  $\mu 2$ . (A) Transferrin receptor internalization was measured in control and  $\mu 2^{PIP2-}$  cells using a monoclonal anti-TfR antibody as ligand. TfR uptake after 5 min, which is reflective of the rate of TfR uptake, was calculated as a percentage of the initial total surface-bound antibody. Data represent mean  $\pm$  SD,  $n = 3$ . n.s., not significant. (B and C) Epifluorescence (Epi)/TIR ratio, which is indicative of curvature acquisition, for individual CCPs plotted as a function of CCP lifetime in  $\mu 2^{WT}$  (B) and  $\mu 2^{PIP2-}$  cells (C), as indicated.  $\mu 2^{PIP2-}$  cells exhibit 2.5-times increased numbers of short-lived, flat, and presumably abortive CCPs, indicative of a defect in CCP maturation. (D) AP2 complexes were immunoprecipitated with anti- $\alpha$  mAb and then subjected to Western blotting using anti- $\mu 2$  and anti-T156 phospho- $\mu 2$  antibodies as indicated.  $\mu 2^{PIP2-}$  cells exhibit an increase  $\mu 2$  phosphorylation on residue T156 relative to  $\mu 2^{wt}$  cells, whereas  $\mu 2$  phosphorylation is decreased in  $\alpha^{PIP2-}$  cells. (E) Treatment with the AAK1 inhibitor, Compound 2, decreases  $\mu 2^{pT156}$  levels in both  $\mu 2^{wt}$  and  $\mu 2^{PIP2-}$  cells.



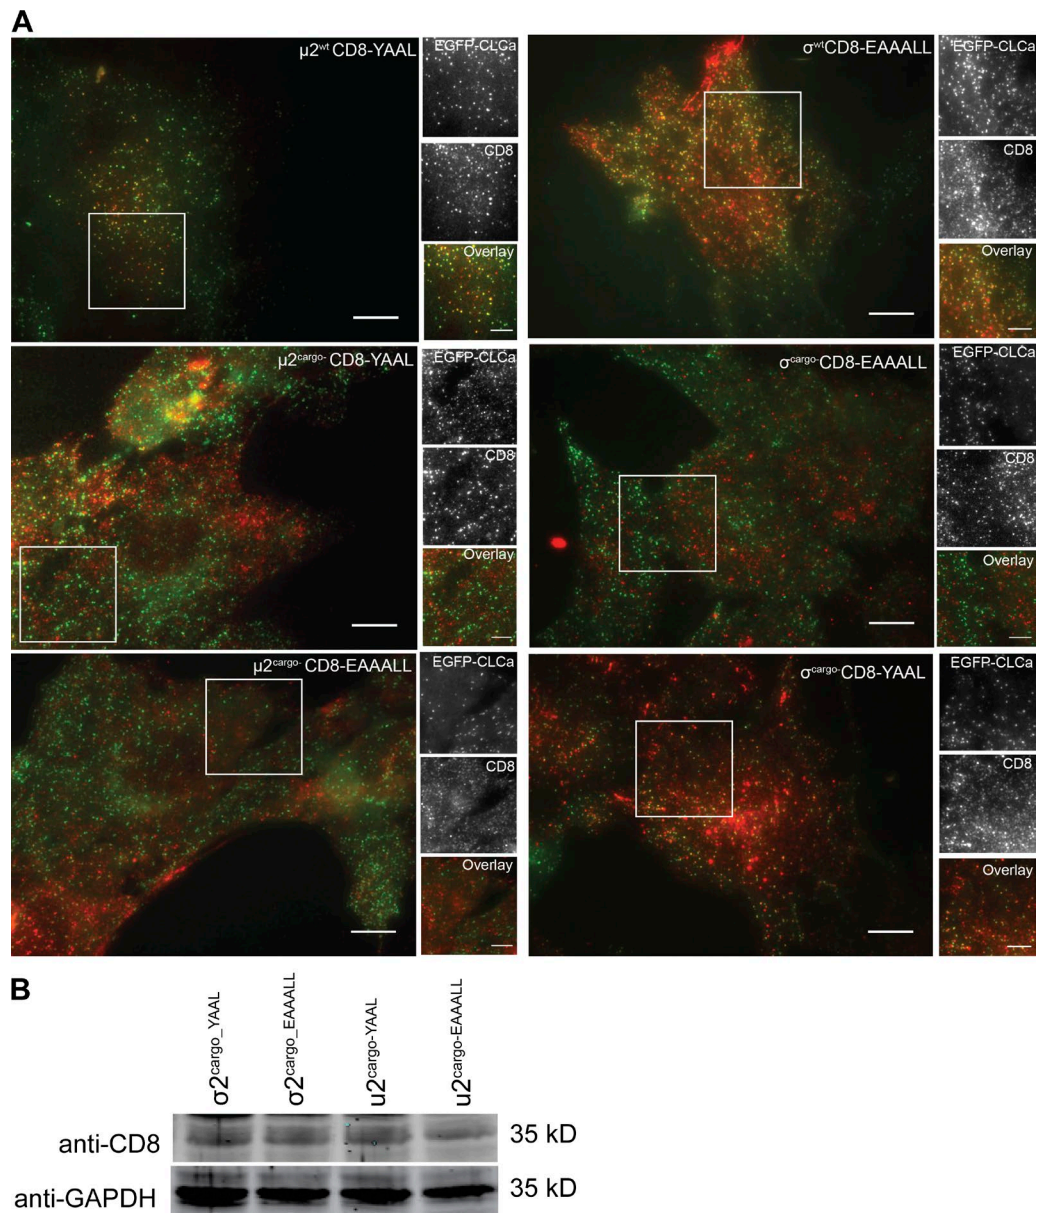

Figure S5. **Adenoviral-mediated expression of model cargo receptors in hterRPE cells.** (A) Immunofluorescence showing colocalization of model cargo CD8-YAAL or CD8-EAAALL detected with mouse monoclonal antibody UCHT-4 against CD8 relative to EGFP-CLCa in WT,  $\mu 2^{\text{cargo-}}$ , or  $\sigma 2^{\text{cargo-}}$  mutant cells as indicated. Bars, 10  $\mu\text{m}$ . (B) Western blot showing equal levels of expression of CD8 chimeras in  $\mu 2^{\text{cargo-}}$  and  $\sigma 2^{\text{cargo-}}$  cells.

**Provided online is a zip file that includes the custom Python and R scripts used for all computational analyses conducted in this study.**
